# Supplementary material for: Development of highly porous calcium phosphate bone cements applying nonionic surface active agents
Source: Royal Society of Chemistry journal article supplement (doi:10.1039/d1ra04266a), 2021-01-01
Supplement: d1ra04266a1.pdf [file d1ra04266a1.pdf]

## Development of highly porous calcium phosphate bone cements applying nonionic surface active agents

Ewelina Cichoń<sup>1</sup>, Bartosz Mielan<sup>1</sup>, Elżbieta Pamuła<sup>1</sup>, Anna Ślósarczyk<sup>1</sup>, Aneta Zima<sup>1\*</sup>

<sup>1</sup> Faculty of Material Science and Ceramics, AGH University of Science and Technology, Mickiewicza Av. 30, 30-059 Krakow, Poland

Number of pages: 2 Number of Figures: 3

### a) Life/dead staining

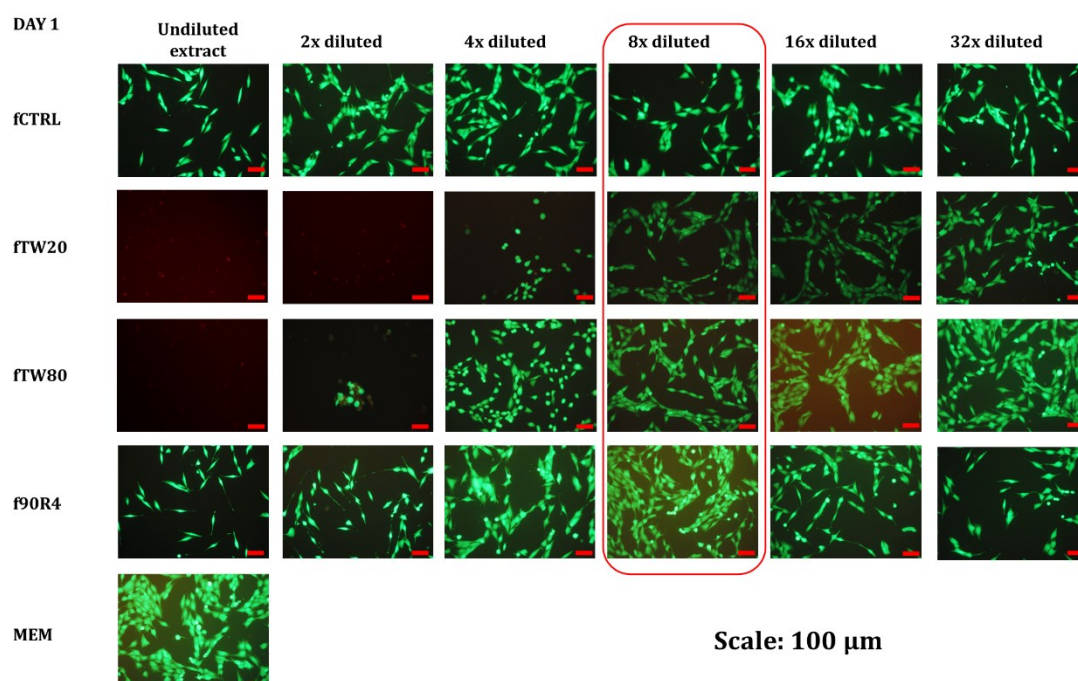

Figure 1s Live/dead staining of MG-63 cells after 1-day incubation in the studied extracts.

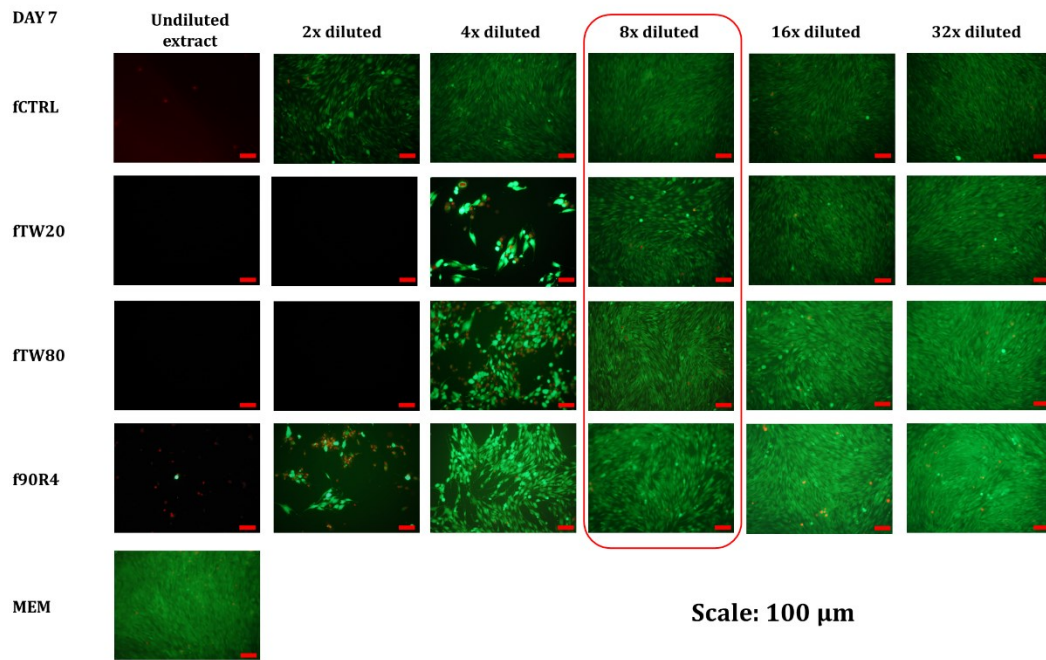

Figure 2s Live/dead staining of MG-63 cells after 7-day incubation in the studied extracts.

b) Microstructure/ bioactivity

7 days in SBF

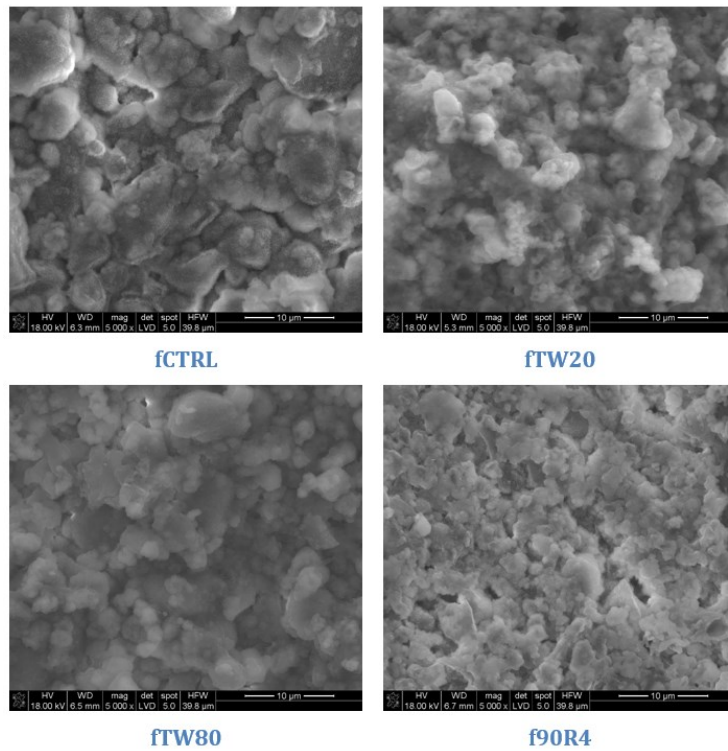

Figure 3s Microstructure of the cements' surfaces after 7-day incubation in SBF.
